# Supplementary material for: Influencia del medio social en la educación y en la formación : diferencias sociales, su influencia sobre la personalidad
Source: HighWire-hosted journal article supplement (doi:10.1136/bmjgh-2022-009402), 2000-01-01

Peace Health/Hyder et al

### Figure 3. Peace Though Health Working Model

(Source: Arya 2004)

[Permission obtained]

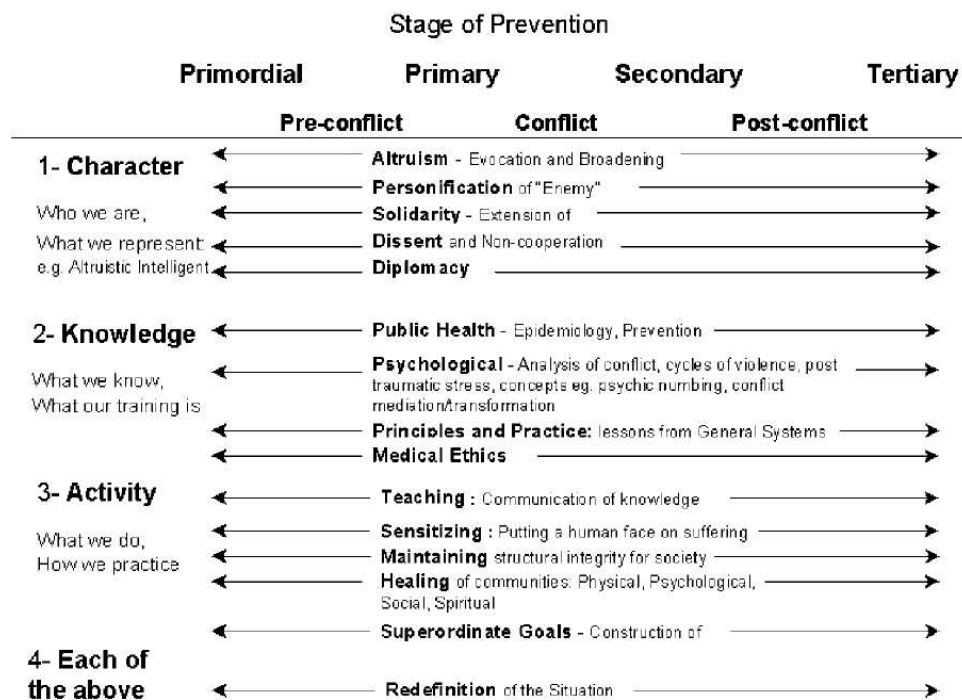

Supplement: bmjgh-2022-009402supp003_data_supplement.pdf [file bmjgh-2022-009402supp003_data_supplement.pdf]
